# Supplementary material for: Near-infrared dual bioluminescence imaging in mouse models of cancer using infraluciferin
Source: eLife journal article supplement (doi:10.7554/elife.45801), 2019-10-14
Supplement: supp [file elife-45801-supp-v1.zip]

## FIGURE 1 -FIGURE SUPPLEMENT 1

### Data collection and refinement statistics (molecular replacement)

|                                                      | Luciferase/iLH2          |
|------------------------------------------------------|--------------------------|
| <b>Data collection</b>                               |                          |
| Space group                                          | P 2 <sub>1</sub>         |
| Cell dimensions                                      |                          |
| <i>a</i> , <i>b</i> , <i>c</i> (Å)                   | 47.509, 114.016, 101.557 |
| $\alpha$ , $\beta$ , $\gamma$ (°)                    | 90.00, 98.18, 90.00      |
| Resolution (Å)                                       | 22.5- 3.1 (3.21)         |
| <i>R</i> <sub>sym</sub> or <i>R</i> <sub>merge</sub> | 22.7 (46.0)              |
| <i>I</i> / $\sigma I$                                | 2.15 (1.1)               |
| Completeness (%)                                     | 94.2 (97.2)              |
| Redundancy                                           | 2.7 (2.6)                |
| <b>Refinement</b>                                    |                          |
| Resolution (Å)                                       | 17.85 - 3.1              |
| No. reflections                                      | 17435(1328)              |
| <i>R</i> <sub>work</sub> / <i>R</i> <sub>free</sub>  | 27.4/32.0 (0.39/0.42)    |
| No. atoms                                            |                          |
| Protein                                              | 8428                     |
| Ligand/ion                                           | 84                       |
| Water                                                | 0                        |
| <i>B</i> -factors                                    | -                        |
| Protein                                              | 43                       |
| Ligand/ion                                           | 24                       |
| R.m.s. deviations                                    | -                        |
| Bond lengths (Å)                                     | 0.01                     |
| Bond angles (°)                                      | 1.417                    |

\*Values in parentheses are for highest-resolution shell.

|                                                      | HJ <sub>2</sub>           | HJ <sub>3</sub>        |
|------------------------------------------------------|---------------------------|------------------------|
| <b>Data collection</b>                               |                           |                        |
| Space group                                          | P 1 2 <sub>1</sub> 1      | P 1 2 <sub>1</sub> 1   |
| Cell dimensions                                      |                           |                        |
| <i>a</i> , <i>b</i> , <i>c</i> (Å)                   | 48.3013, 45.9128, 62.4669 | 49.937, 45.374, 63.828 |
| α, β, γ (°)                                          | 90.00, 99.2863, 90.00     | 90.00, 101.01, 90.00   |
| Resolution (Å)                                       | 24-3.5 () *               | 49-2.69 (2.74-2.69)    |
| <i>R</i> <sub>sym</sub> or <i>R</i> <sub>merge</sub> | 10.5 ()                   | 5.4% (64%)             |
| <i>I</i> / σ <i>I</i>                                | 17.4 ()                   | 10.9 (1.6)             |
| Completeness (%)                                     | 99.7 ()                   | 99.9 (97.6)            |
| Redundancy                                           | 6.1 ()                    | 3.6 (3.7)              |
| <b>Refinement</b>                                    |                           |                        |
| Resolution (Å)                                       | 30-3.05                   | 49-3.0                 |
| No. reflections                                      | 5038                      | 5446                   |
| <i>R</i> <sub>work</sub> / <i>R</i> <sub>free</sub>  | 23.0/32.3                 | 24.6/28.5              |
| No. atoms                                            |                           |                        |
| DNA                                                  | 1684                      | 1712                   |
| Ligand/ion                                           | 2                         | 2                      |
| <i>B</i> -factors                                    |                           |                        |
| Protein                                              | 77                        | 50                     |
| Ligand/ion                                           |                           | 49                     |
| R.m.s deviations                                     |                           |                        |
| Bond lengths (Å)                                     | 0.008                     | 0.008                  |
| Bond angles (°)                                      | 1.47                      | 1.56                   |

\*Values in parentheses are for highest-resolution shell.

## Data collection, phasing and refinement statistics for mad (semet) structures

|                                                      | Native | Crystal 1<br>name |                   |               | Crystal 2<br>name |                   |
|------------------------------------------------------|--------|-------------------|-------------------|---------------|-------------------|-------------------|
| <b>Data collection</b>                               |        |                   |                   |               |                   |                   |
| Space group                                          |        | common #          |                   |               | common #          |                   |
| Cell dimensions                                      |        |                   |                   |               |                   |                   |
| <i>a</i> , <i>b</i> , <i>c</i> (Å)                   |        | common #          |                   |               | common #          |                   |
| α, β, γ (°)                                          |        | common #          |                   |               | common #          |                   |
|                                                      |        | <i>Peak</i>       | <i>Inflection</i> | <i>Remote</i> | <i>Peak</i>       | <i>Inflection</i> |
| Wavelength                                           |        | #                 | #                 | #             | #                 | #                 |
| Resolution (Å)                                       |        | #                 | #                 | #             | #                 | #                 |
| <i>R</i> <sub>sym</sub> or <i>R</i> <sub>merge</sub> |        | #                 | #                 | #             | #                 | #                 |
| <i>I</i> / σ <i>I</i>                                |        | #                 | #                 | #             | #                 | #                 |
| Completeness (%)                                     |        | #                 | #                 | #             | #                 | #                 |
| Redundancy                                           |        | #                 | #                 | #             | #                 | #                 |
| <b>Refinement</b>                                    |        |                   |                   |               |                   |                   |
| Resolution (Å)                                       |        | common #          |                   |               | common #          |                   |
| No. reflections                                      |        |                   |                   |               |                   |                   |
| <i>R</i> <sub>work</sub> / <i>R</i> <sub>free</sub>  |        |                   |                   |               |                   |                   |
| No. atoms                                            |        |                   |                   |               |                   |                   |
| Protein                                              |        |                   |                   |               |                   |                   |
| Ligand/ion                                           |        |                   |                   |               |                   |                   |
| Water                                                |        |                   |                   |               |                   |                   |
| <i>B</i> -factors                                    |        |                   |                   |               |                   |                   |
| Protein                                              |        |                   |                   |               |                   |                   |
| Ligand/ion                                           |        |                   |                   |               |                   |                   |
| Water                                                |        |                   |                   |               |                   |                   |
| R.m.s deviations                                     |        |                   |                   |               |                   |                   |
| Bond lengths (Å)                                     |        |                   |                   |               |                   |                   |
| Bond angles (°)                                      |        |                   |                   |               |                   |                   |

\*Number of xtals for each structure should be noted in footnote. \*Values in parentheses are for highest-resolution shell.
