# Supplementary material for: Near-infrared dual bioluminescence imaging in mouse models of cancer using infraluciferin
Source: eLife journal article supplement (doi:10.7554/elife.45801), 2019-10-14

# FIGURE 1 - FIGURE SUPPLEMENT 2

## COPIES OF <sup>1</sup>H AND <sup>13</sup>C NMR SPECTRA FOR SYNTHETIC CHEMICAL COMPOUNDS

<sup>1</sup>H NMR compound **3** Isomeric mixture

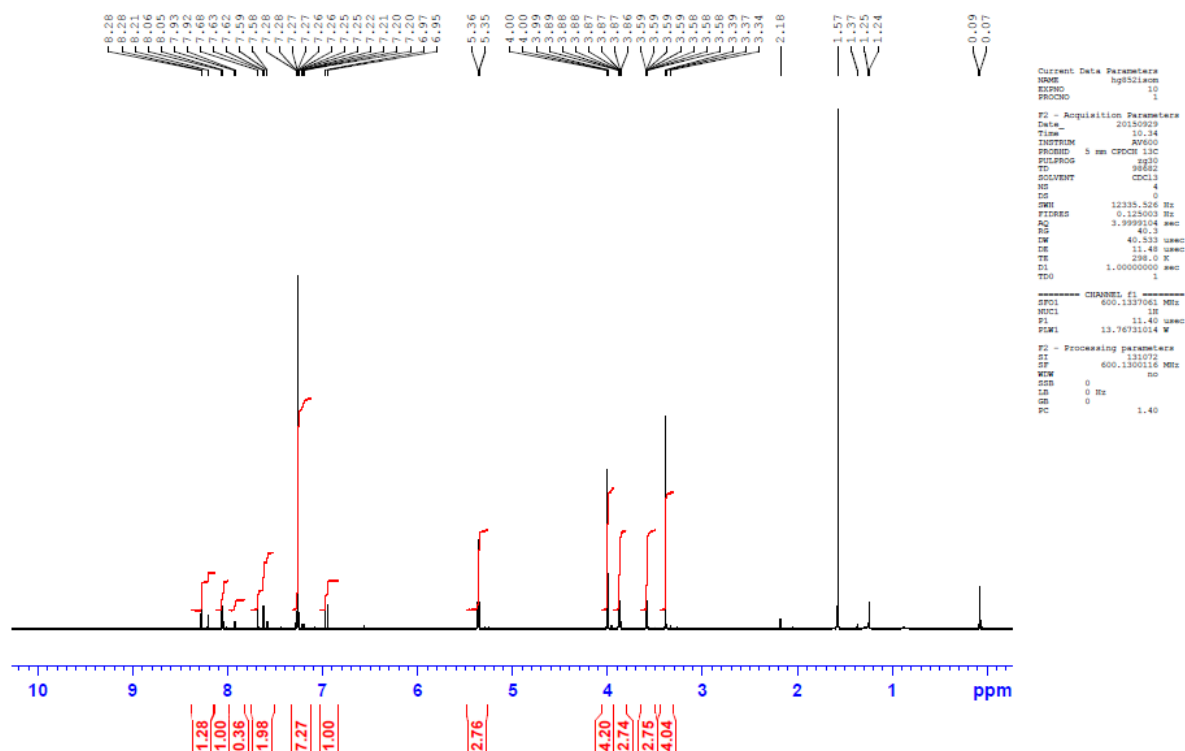

<sup>1</sup>H NMR compound **3**

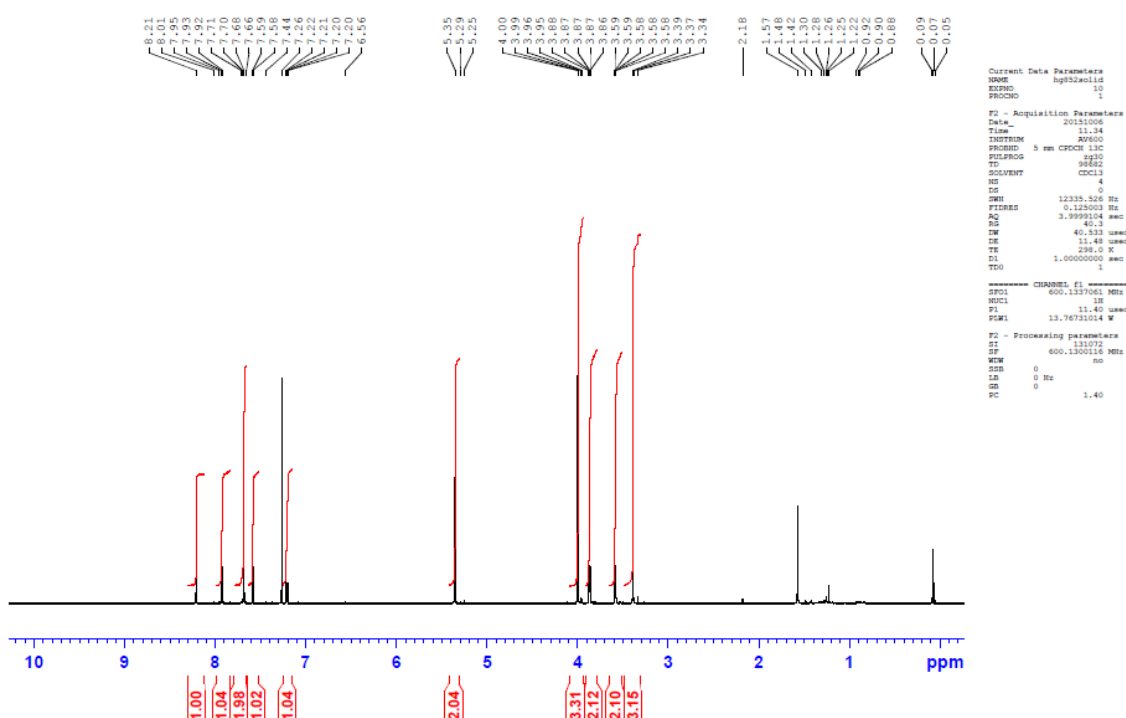

9 <sup>13</sup>C NMR compound 3  
10

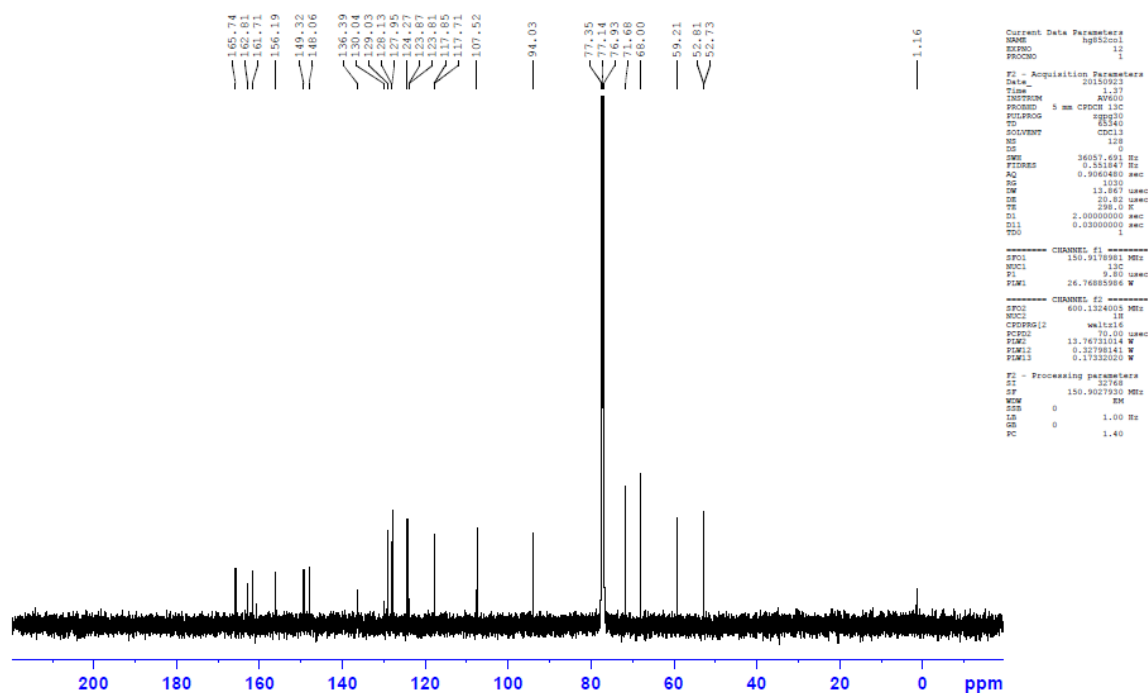

11  
12 <sup>1</sup>H NMR compound 4  
13  
14

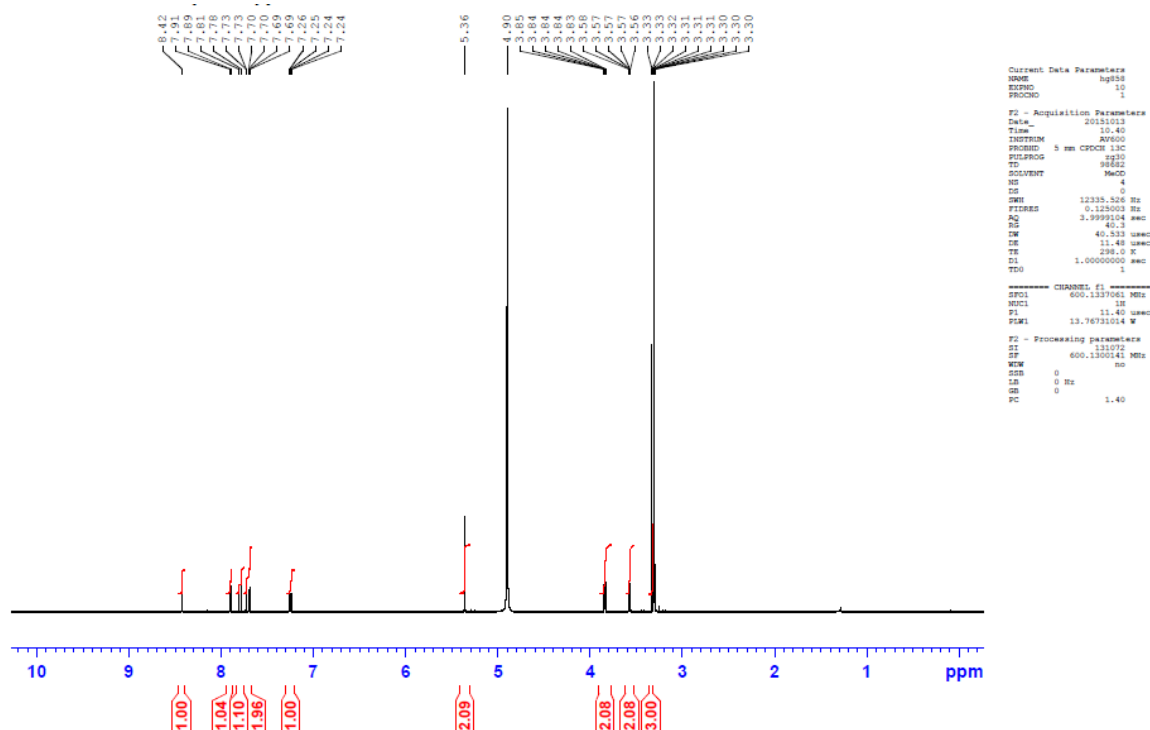



31  $^{13}\text{C}$  NMR compound 5

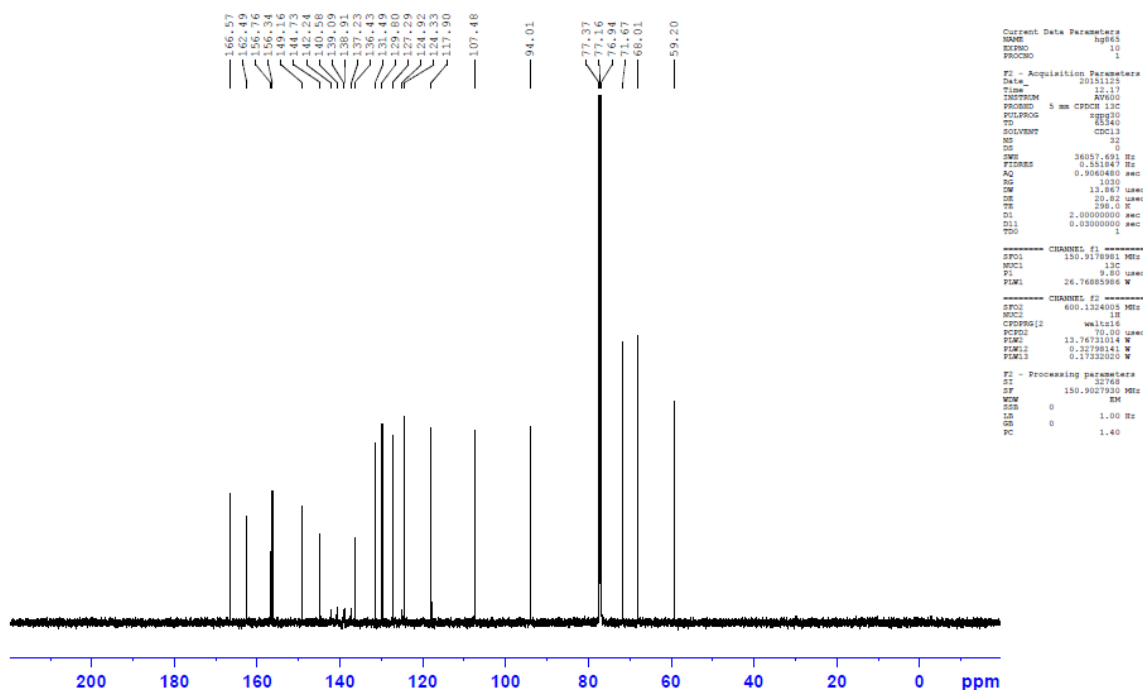

32  
33  
34  
35  $^1\text{H}$  NMR compound 6  
36

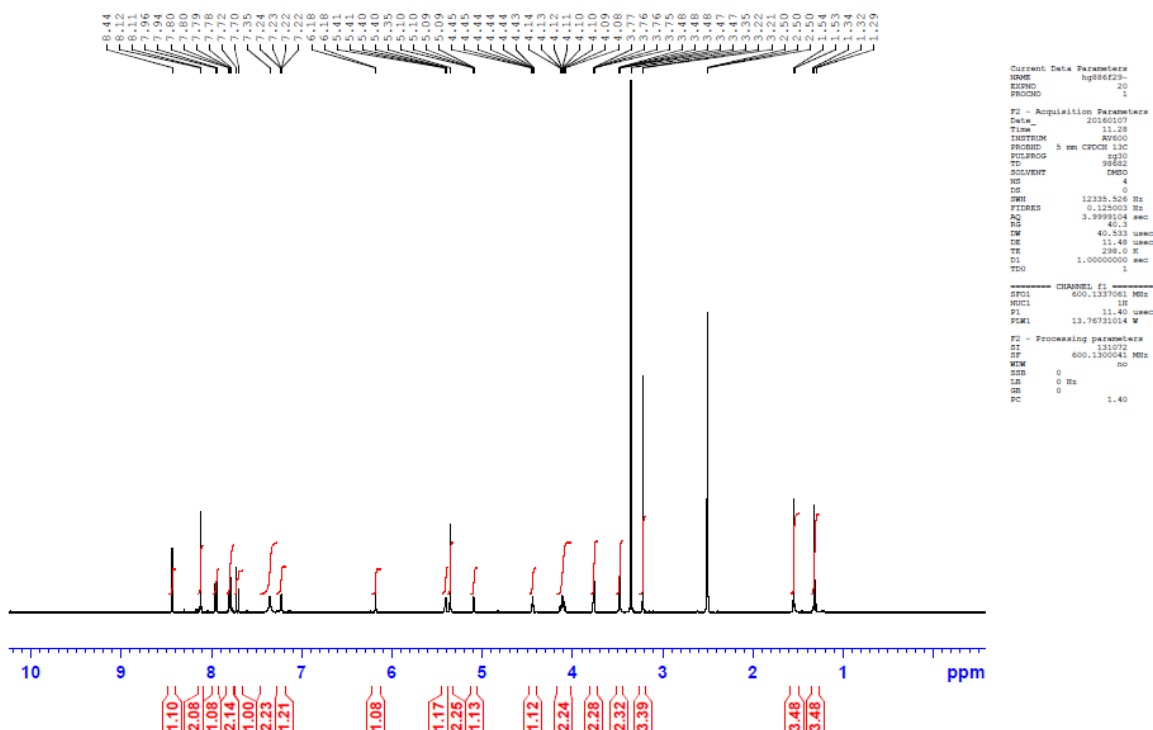

42  $^{13}\text{C}$  NMR compound **6**  
43

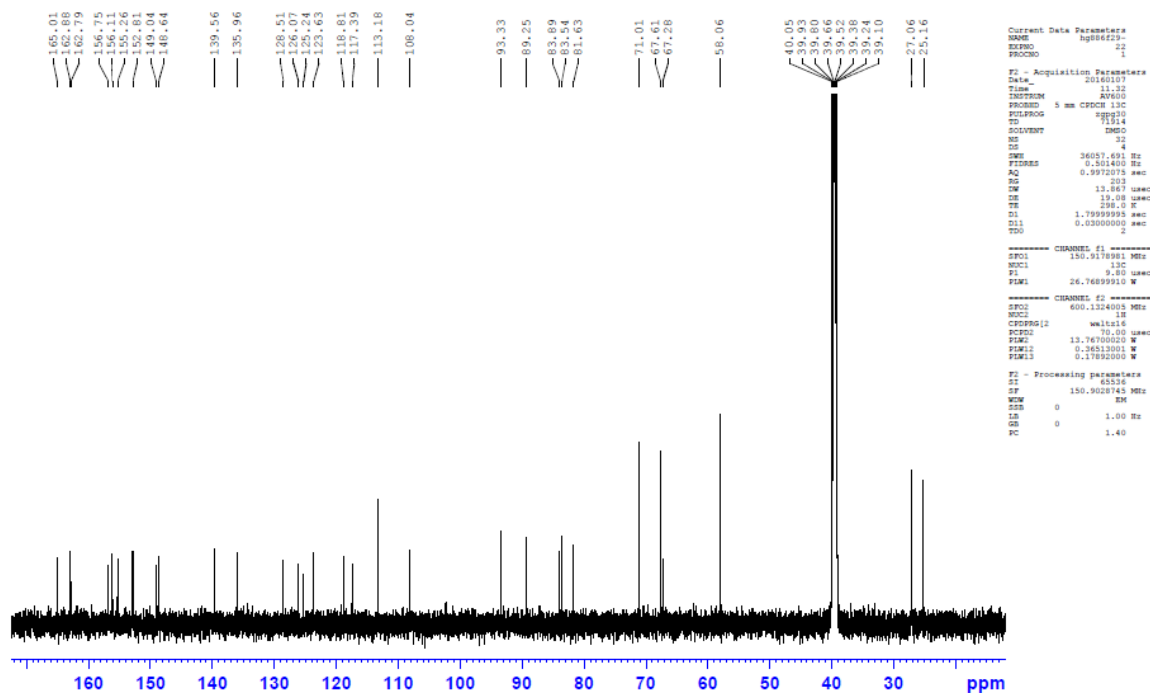

44  
45  
46  $^1\text{H}$  NMR compound **6**

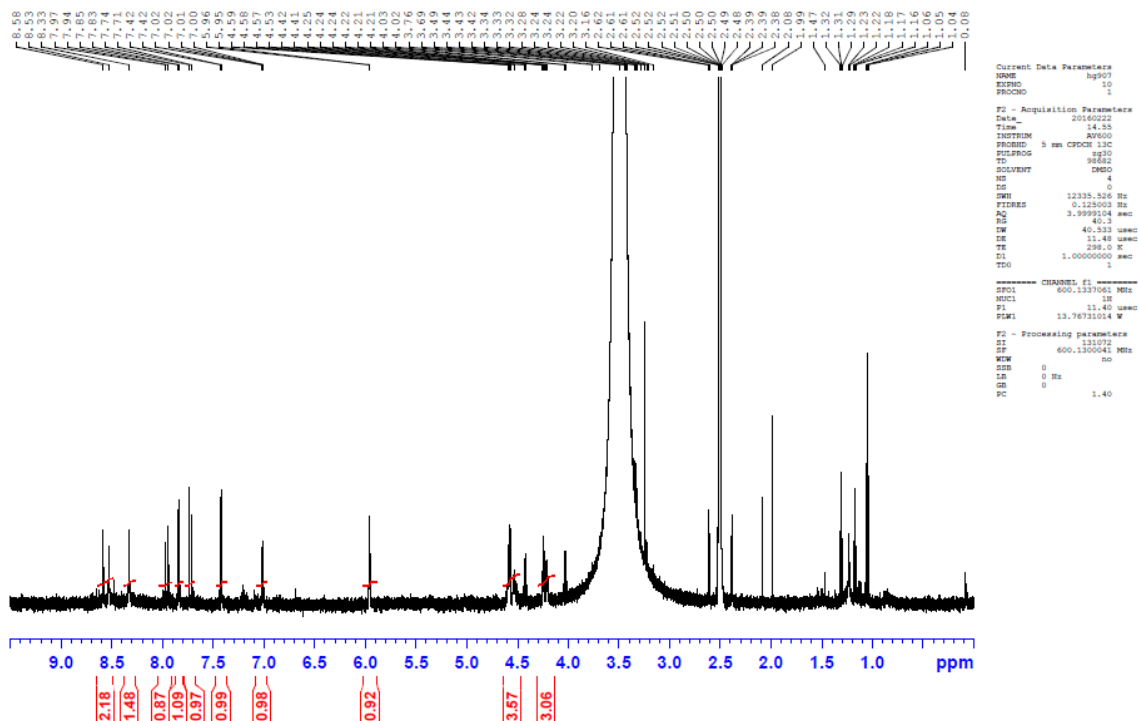

52  $^1\text{H}$  NMR compound *i*DLA expansion  
53

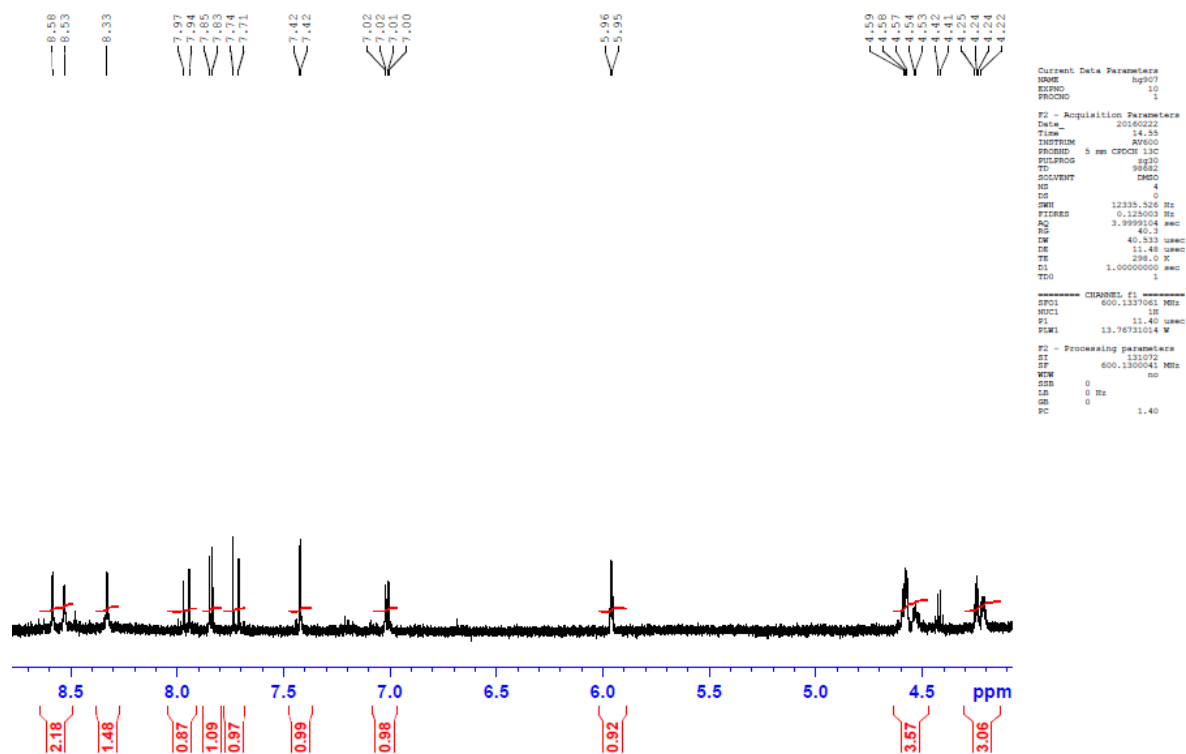

54  
55  
56  
57  
58  $^{13}\text{C}$  NMR compound *i*DLA

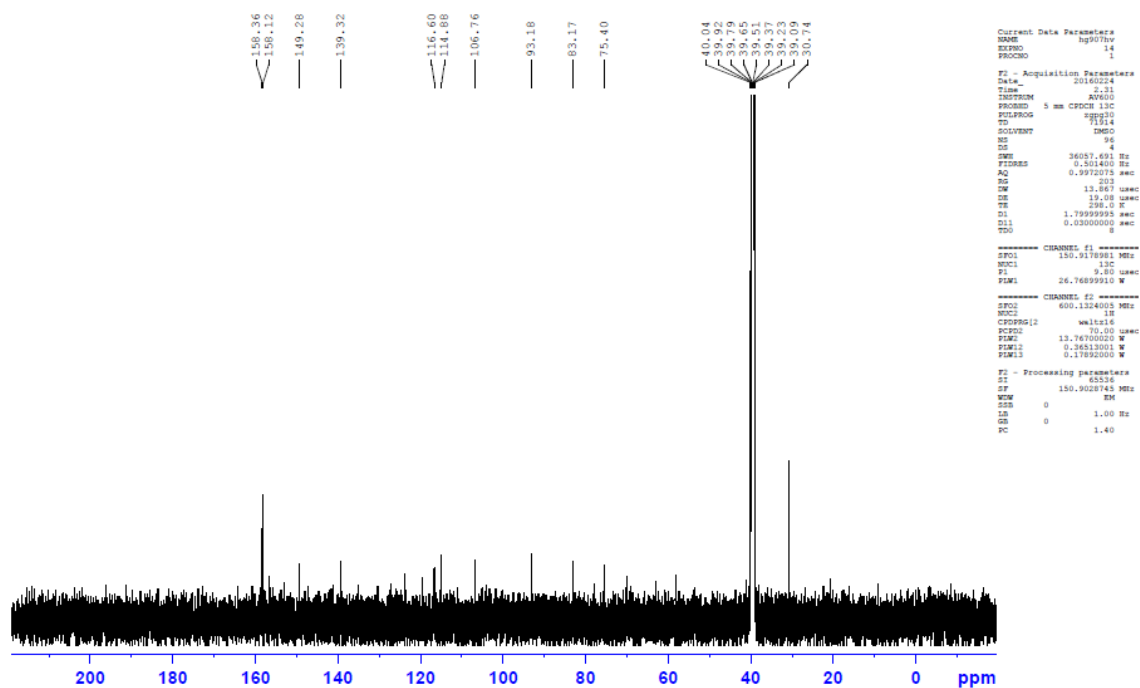

Supplement: supp [file elife-45801-supp-v1.zip › elife_poa_e45801_Figure_1_figure_supplement_2.pdf]
