# Supplementary figures and images for: Near-infrared dual bioluminescence imaging in mouse models of cancer using infraluciferin
Source: eLife journal article supplement (doi:10.7554/elife.45801), 2019-10-14

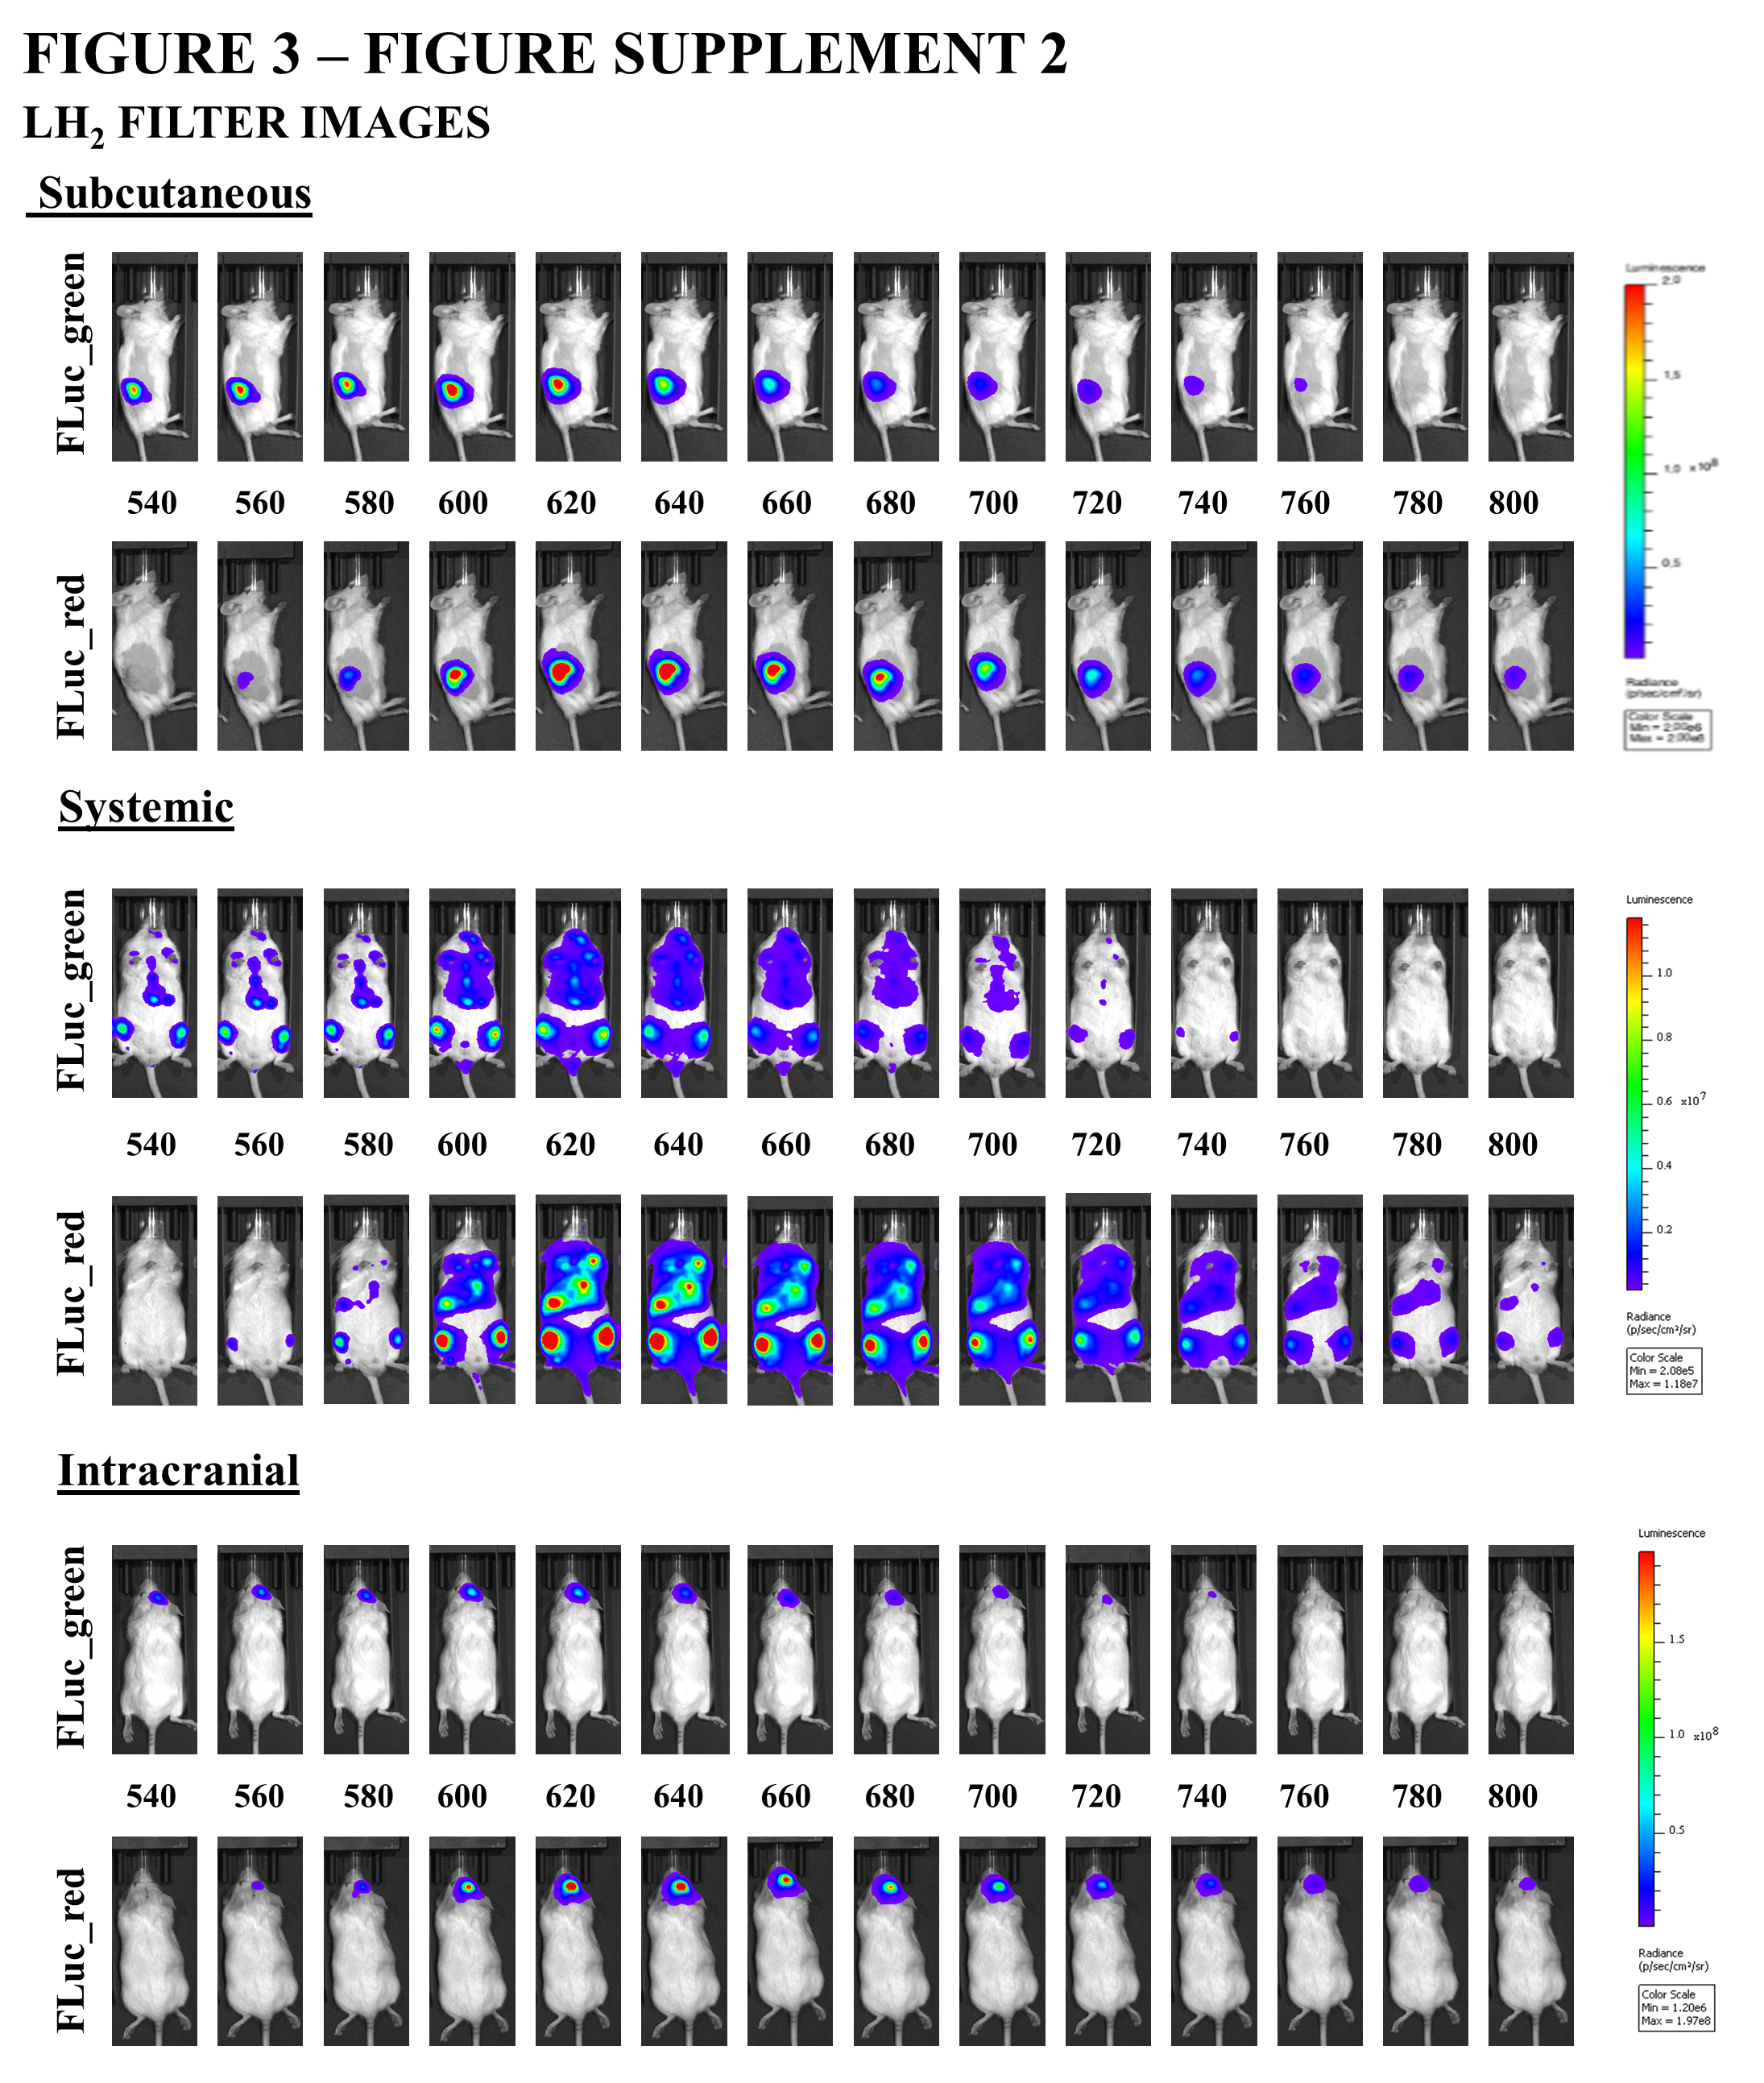

Supplement: supp [file elife-45801-supp-v1.zip › elife_poa_e45801_Figure_3_figure_supplement_2.tif]

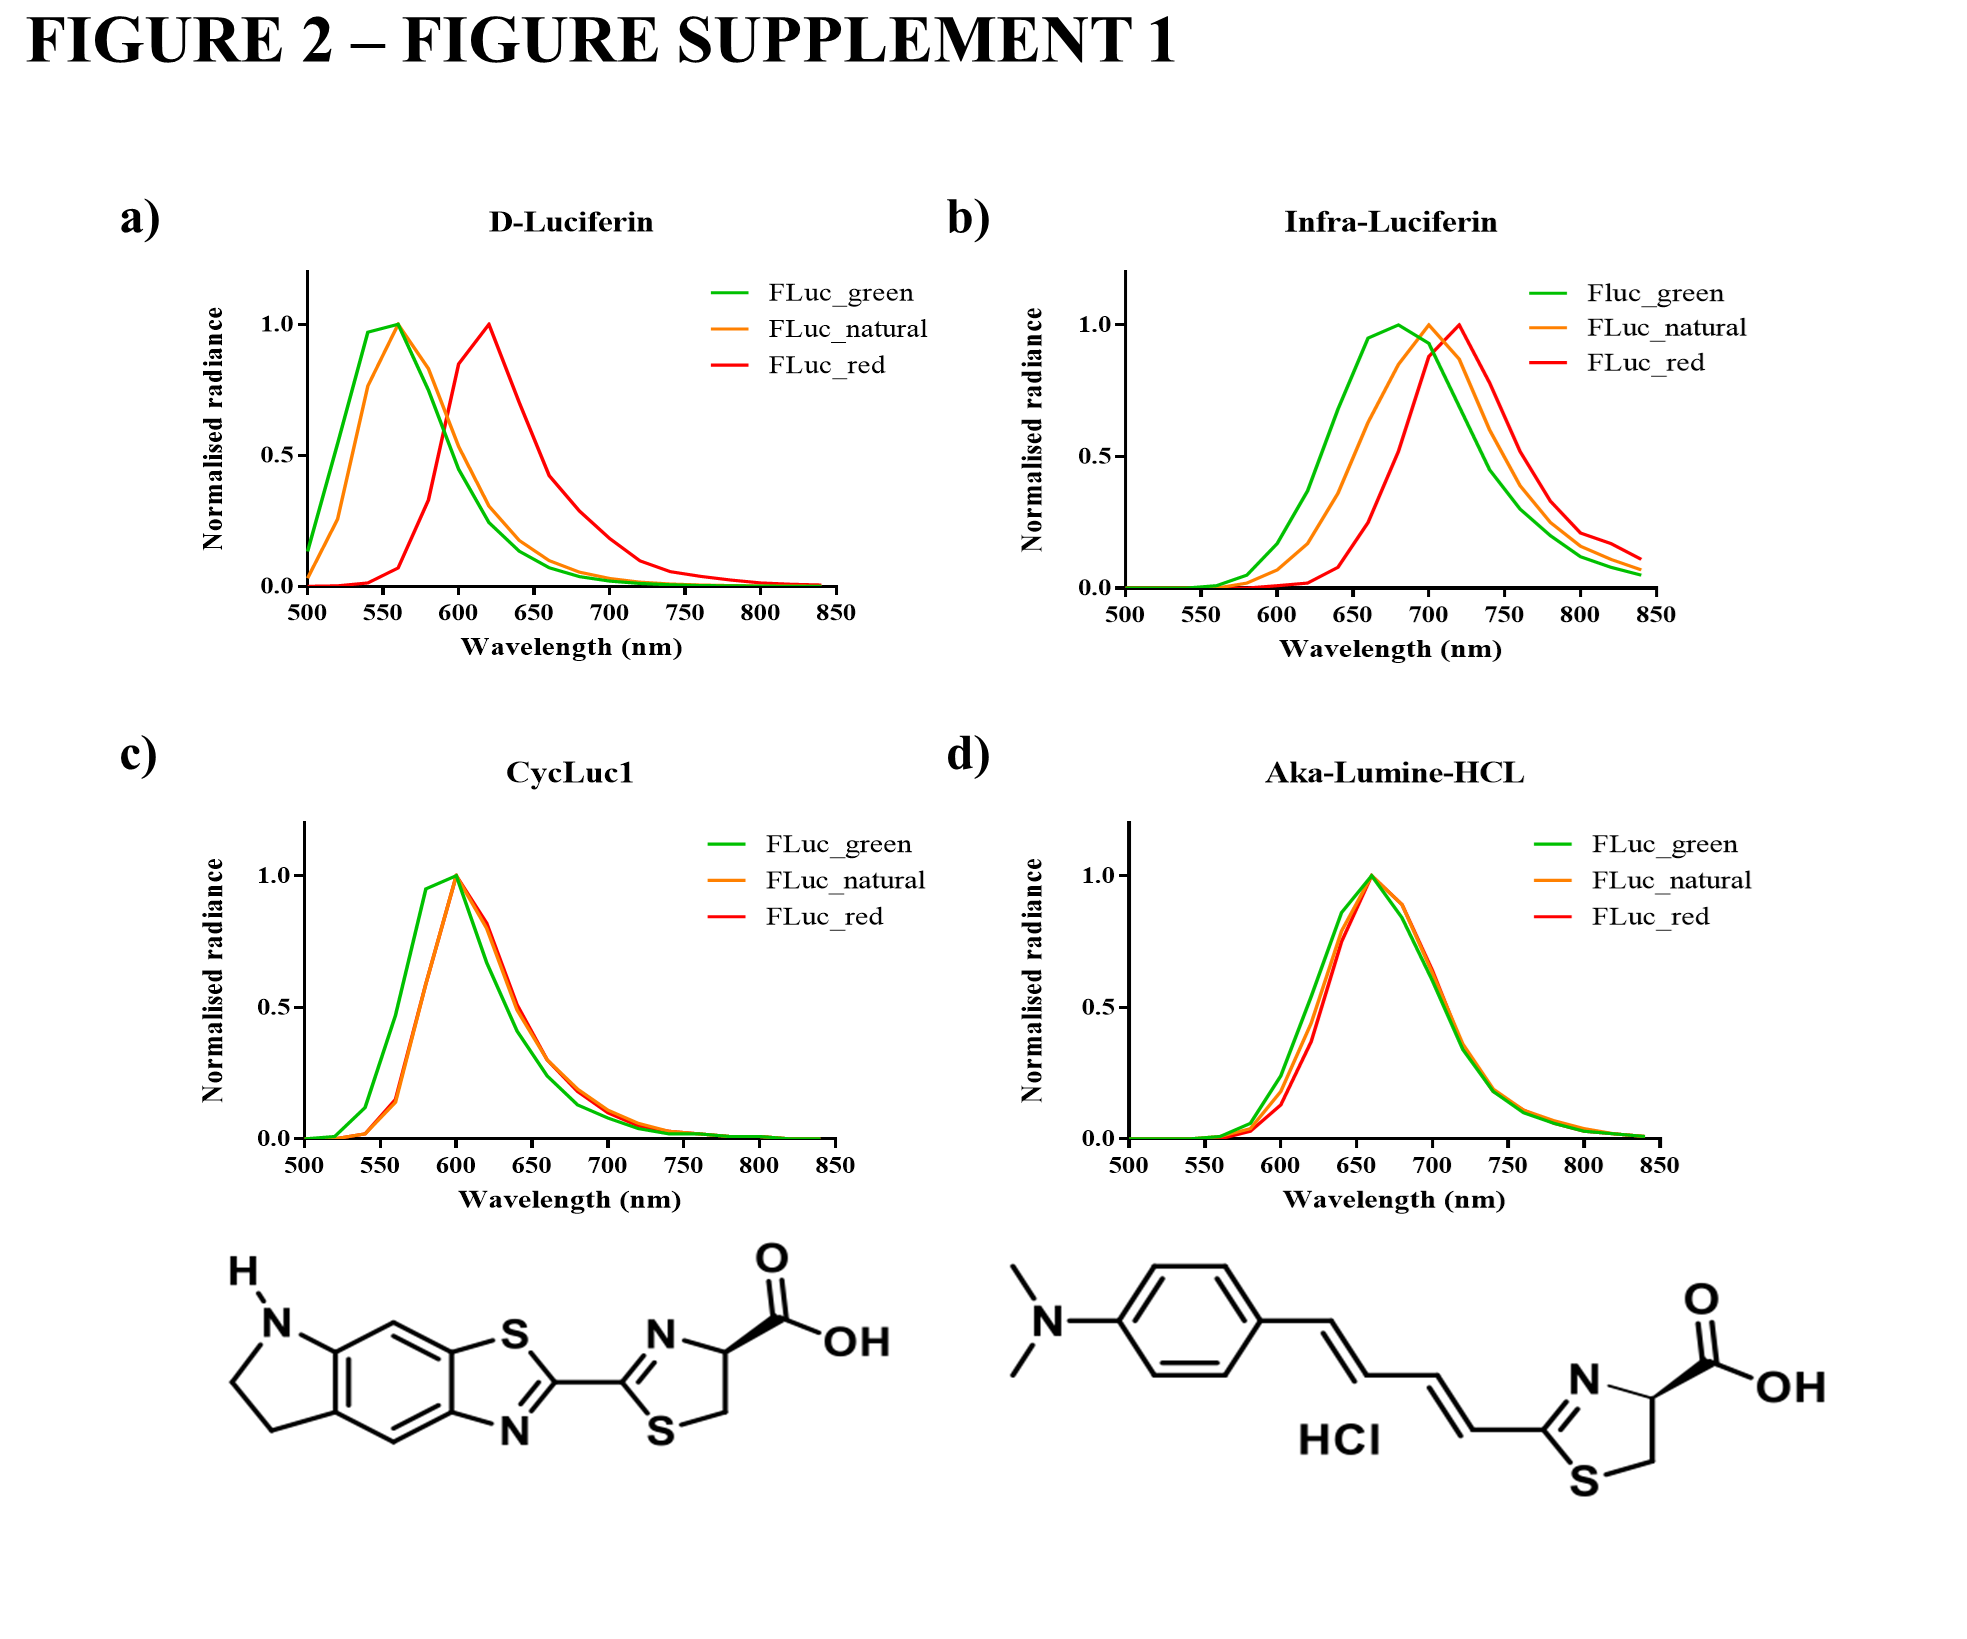

Supplement: supp [file elife-45801-supp-v1.zip › elife_poa_e45801_Figure_2_figure_supplement_1.tif]

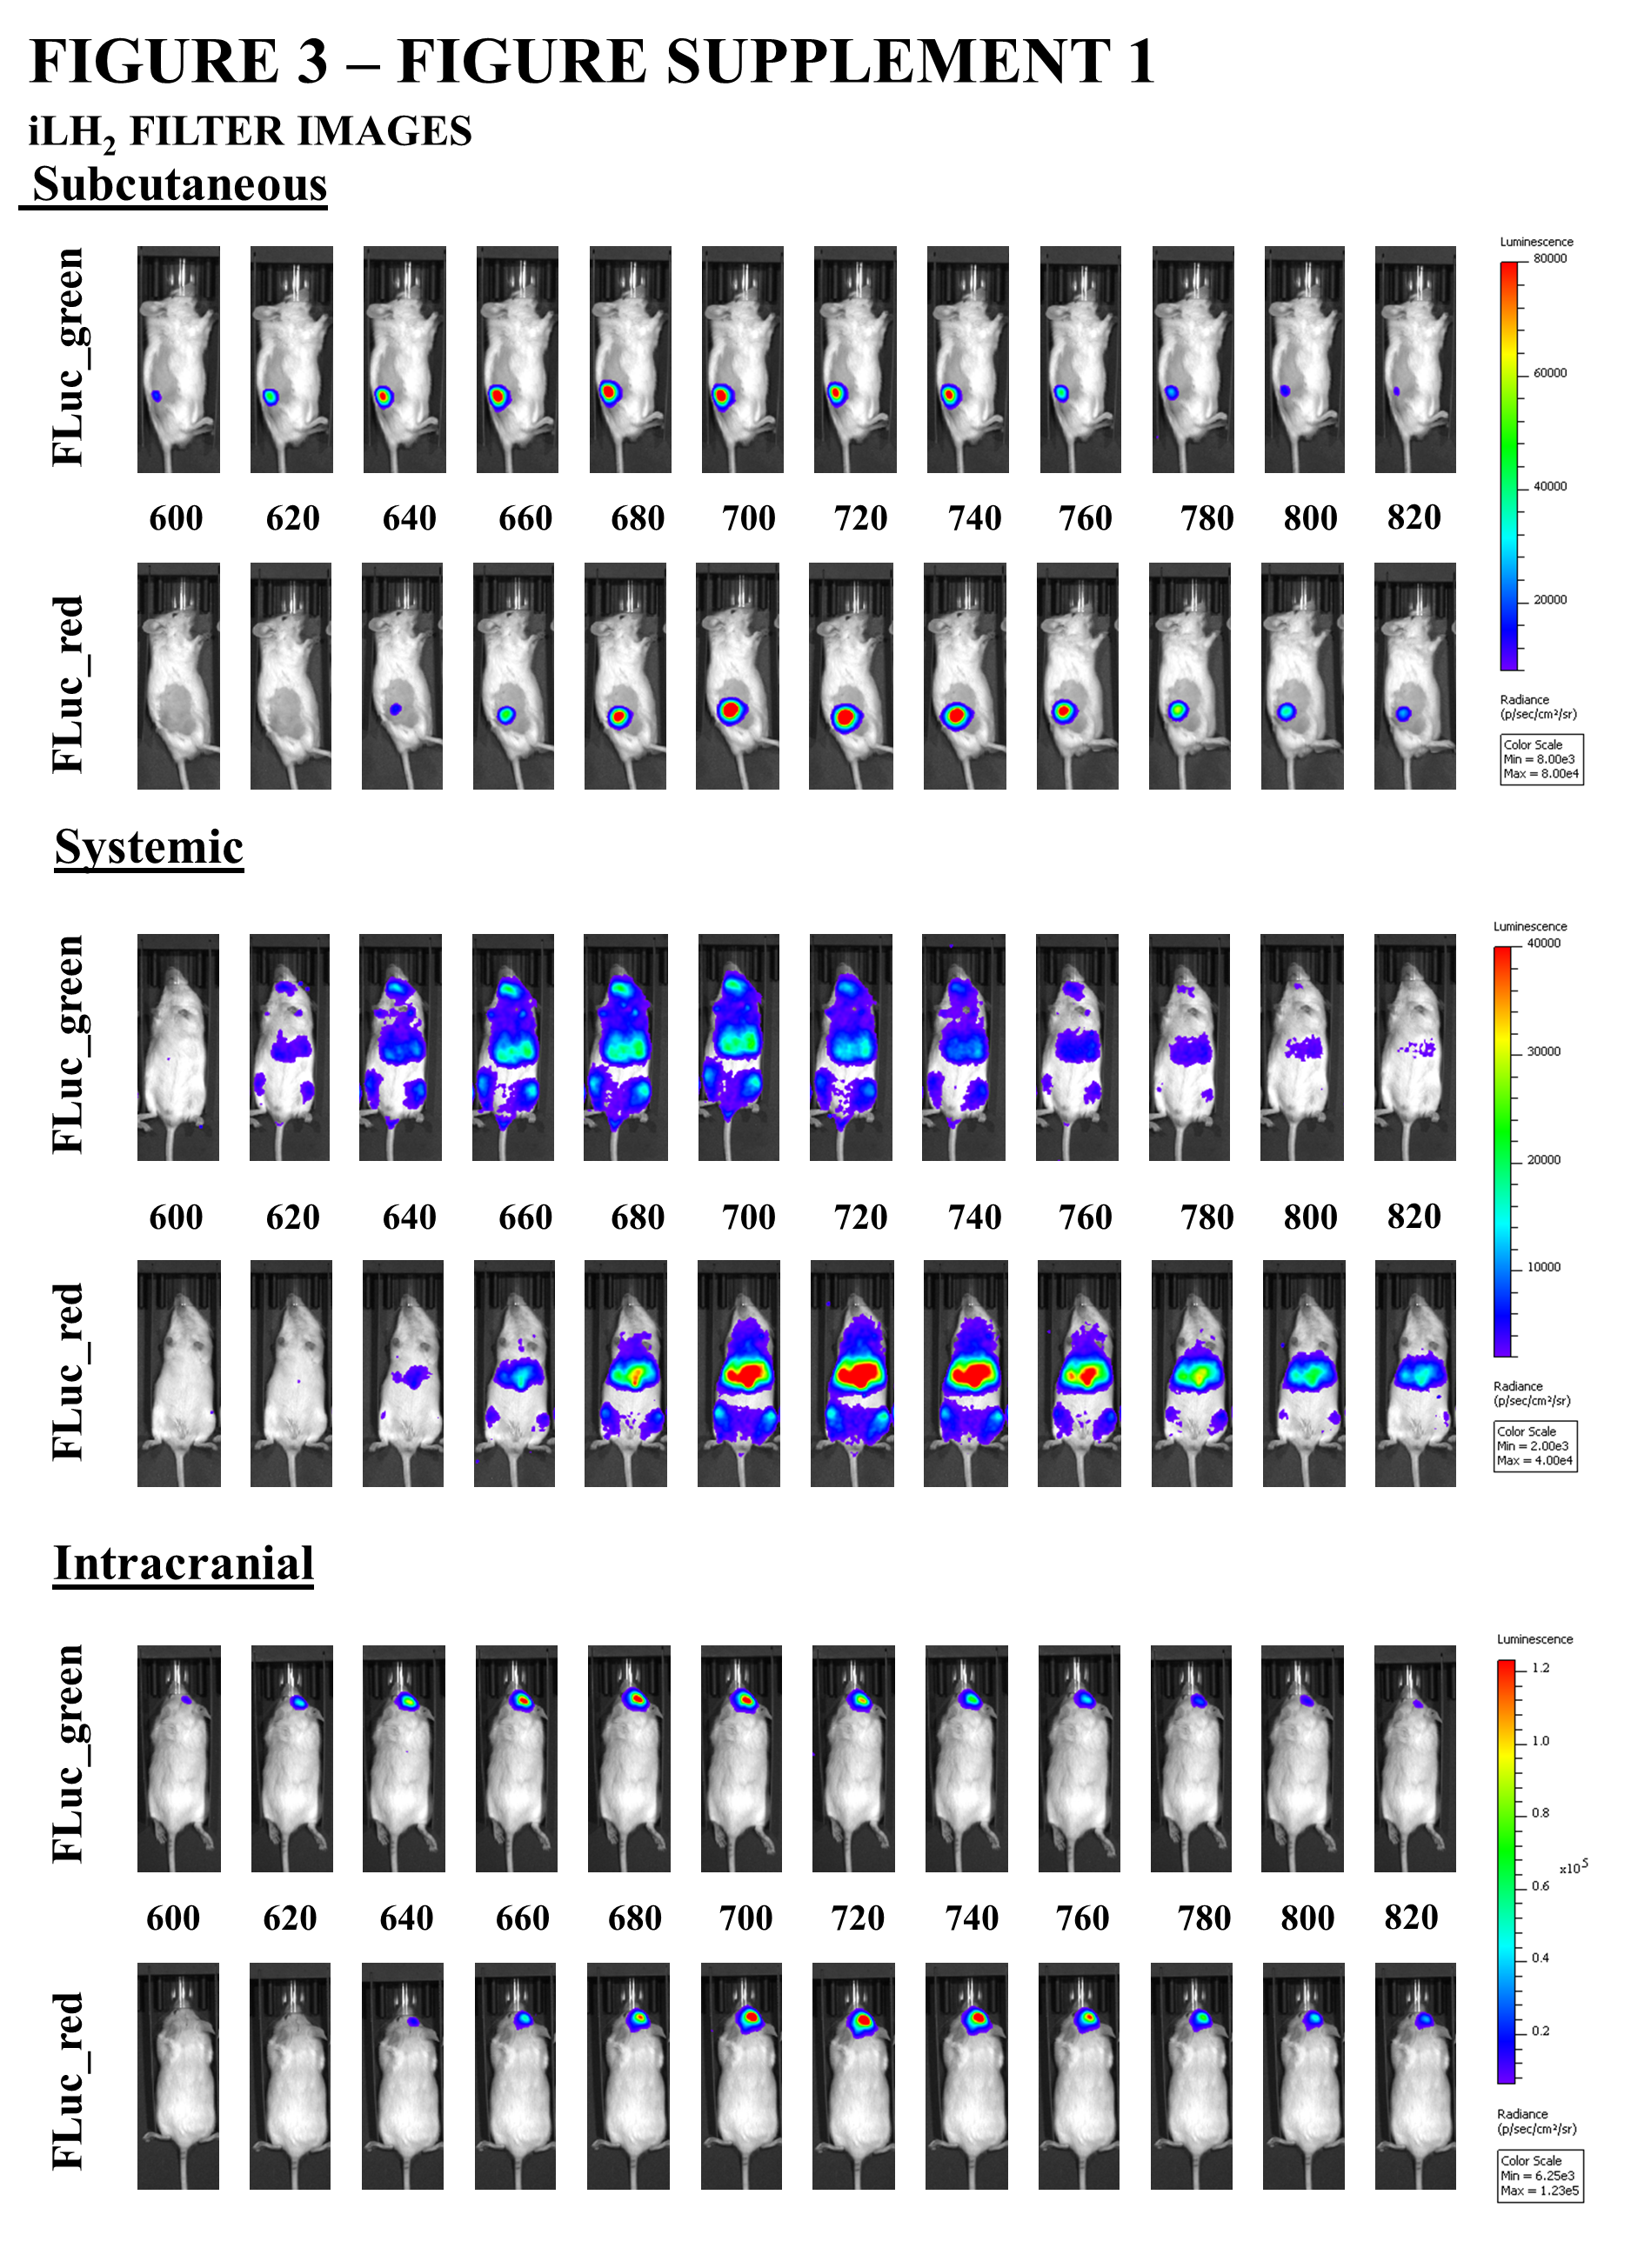

Supplement: supp [file elife-45801-supp-v1.zip › elife_poa_e45801_Figure_3_figure_supplement_1.tif]

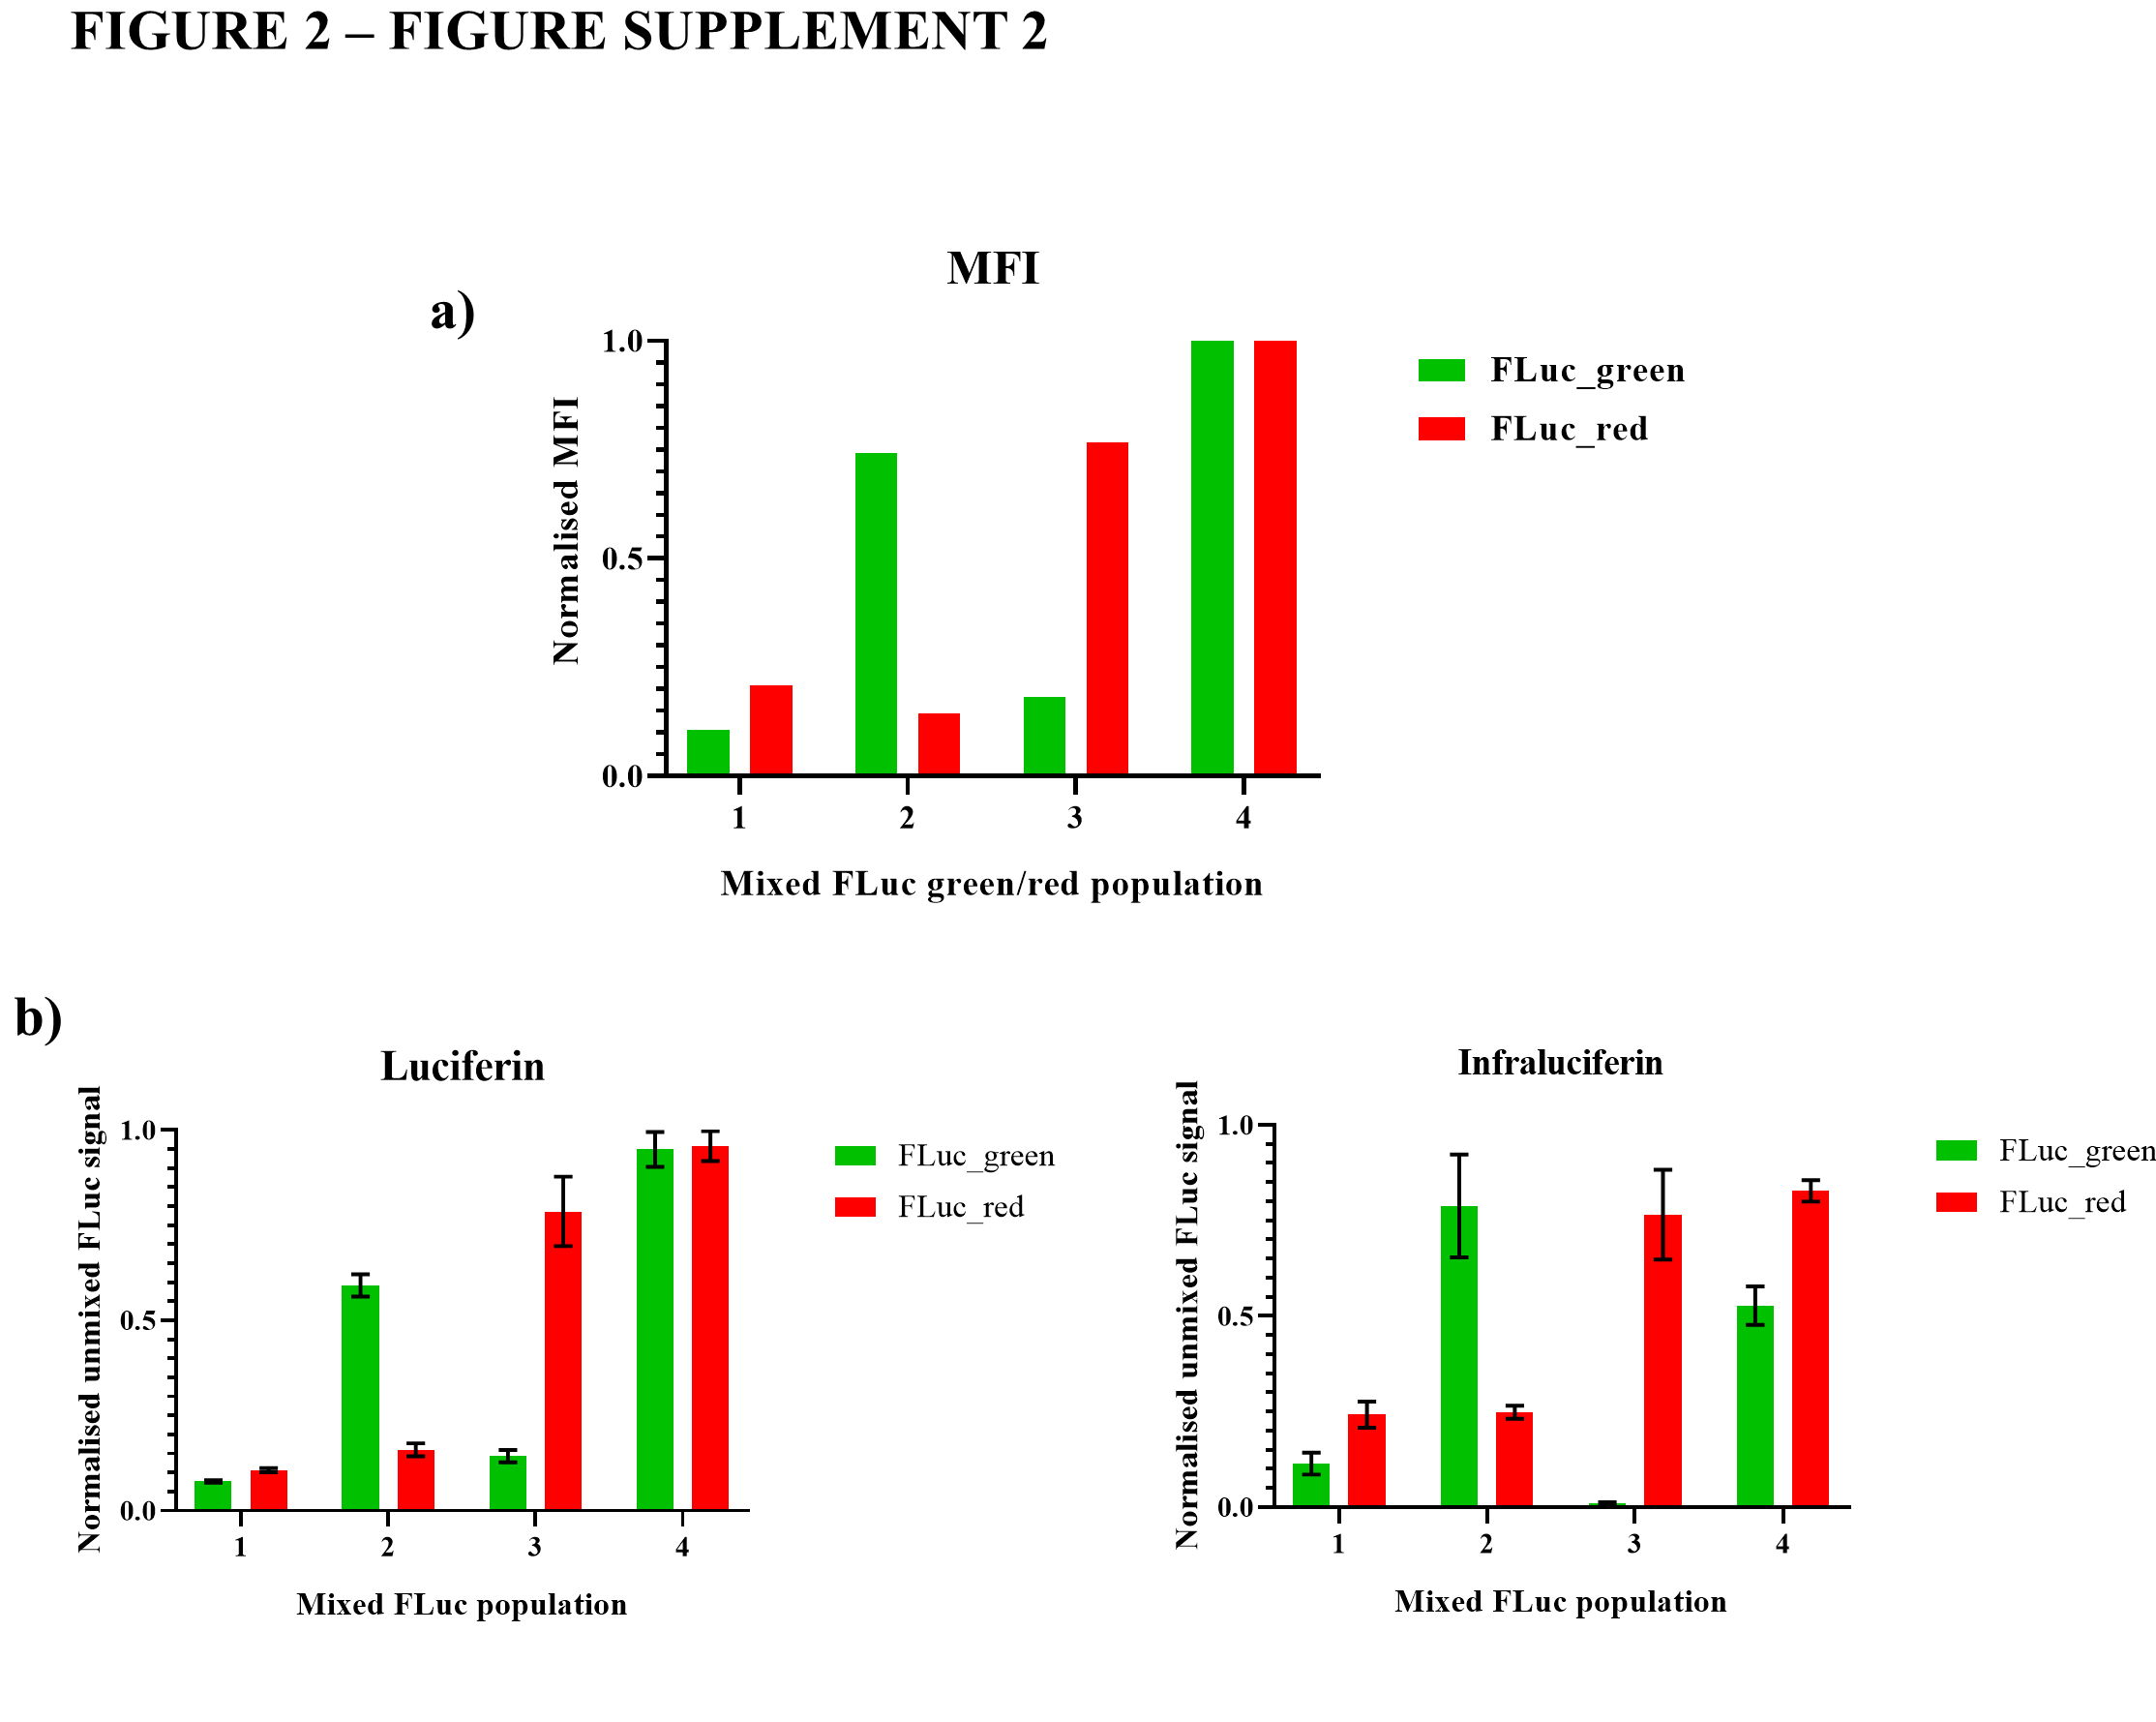

Supplement: supp [file elife-45801-supp-v1.zip › elife_poa_e45801_Figure_2_figure_supplement_2.tif]

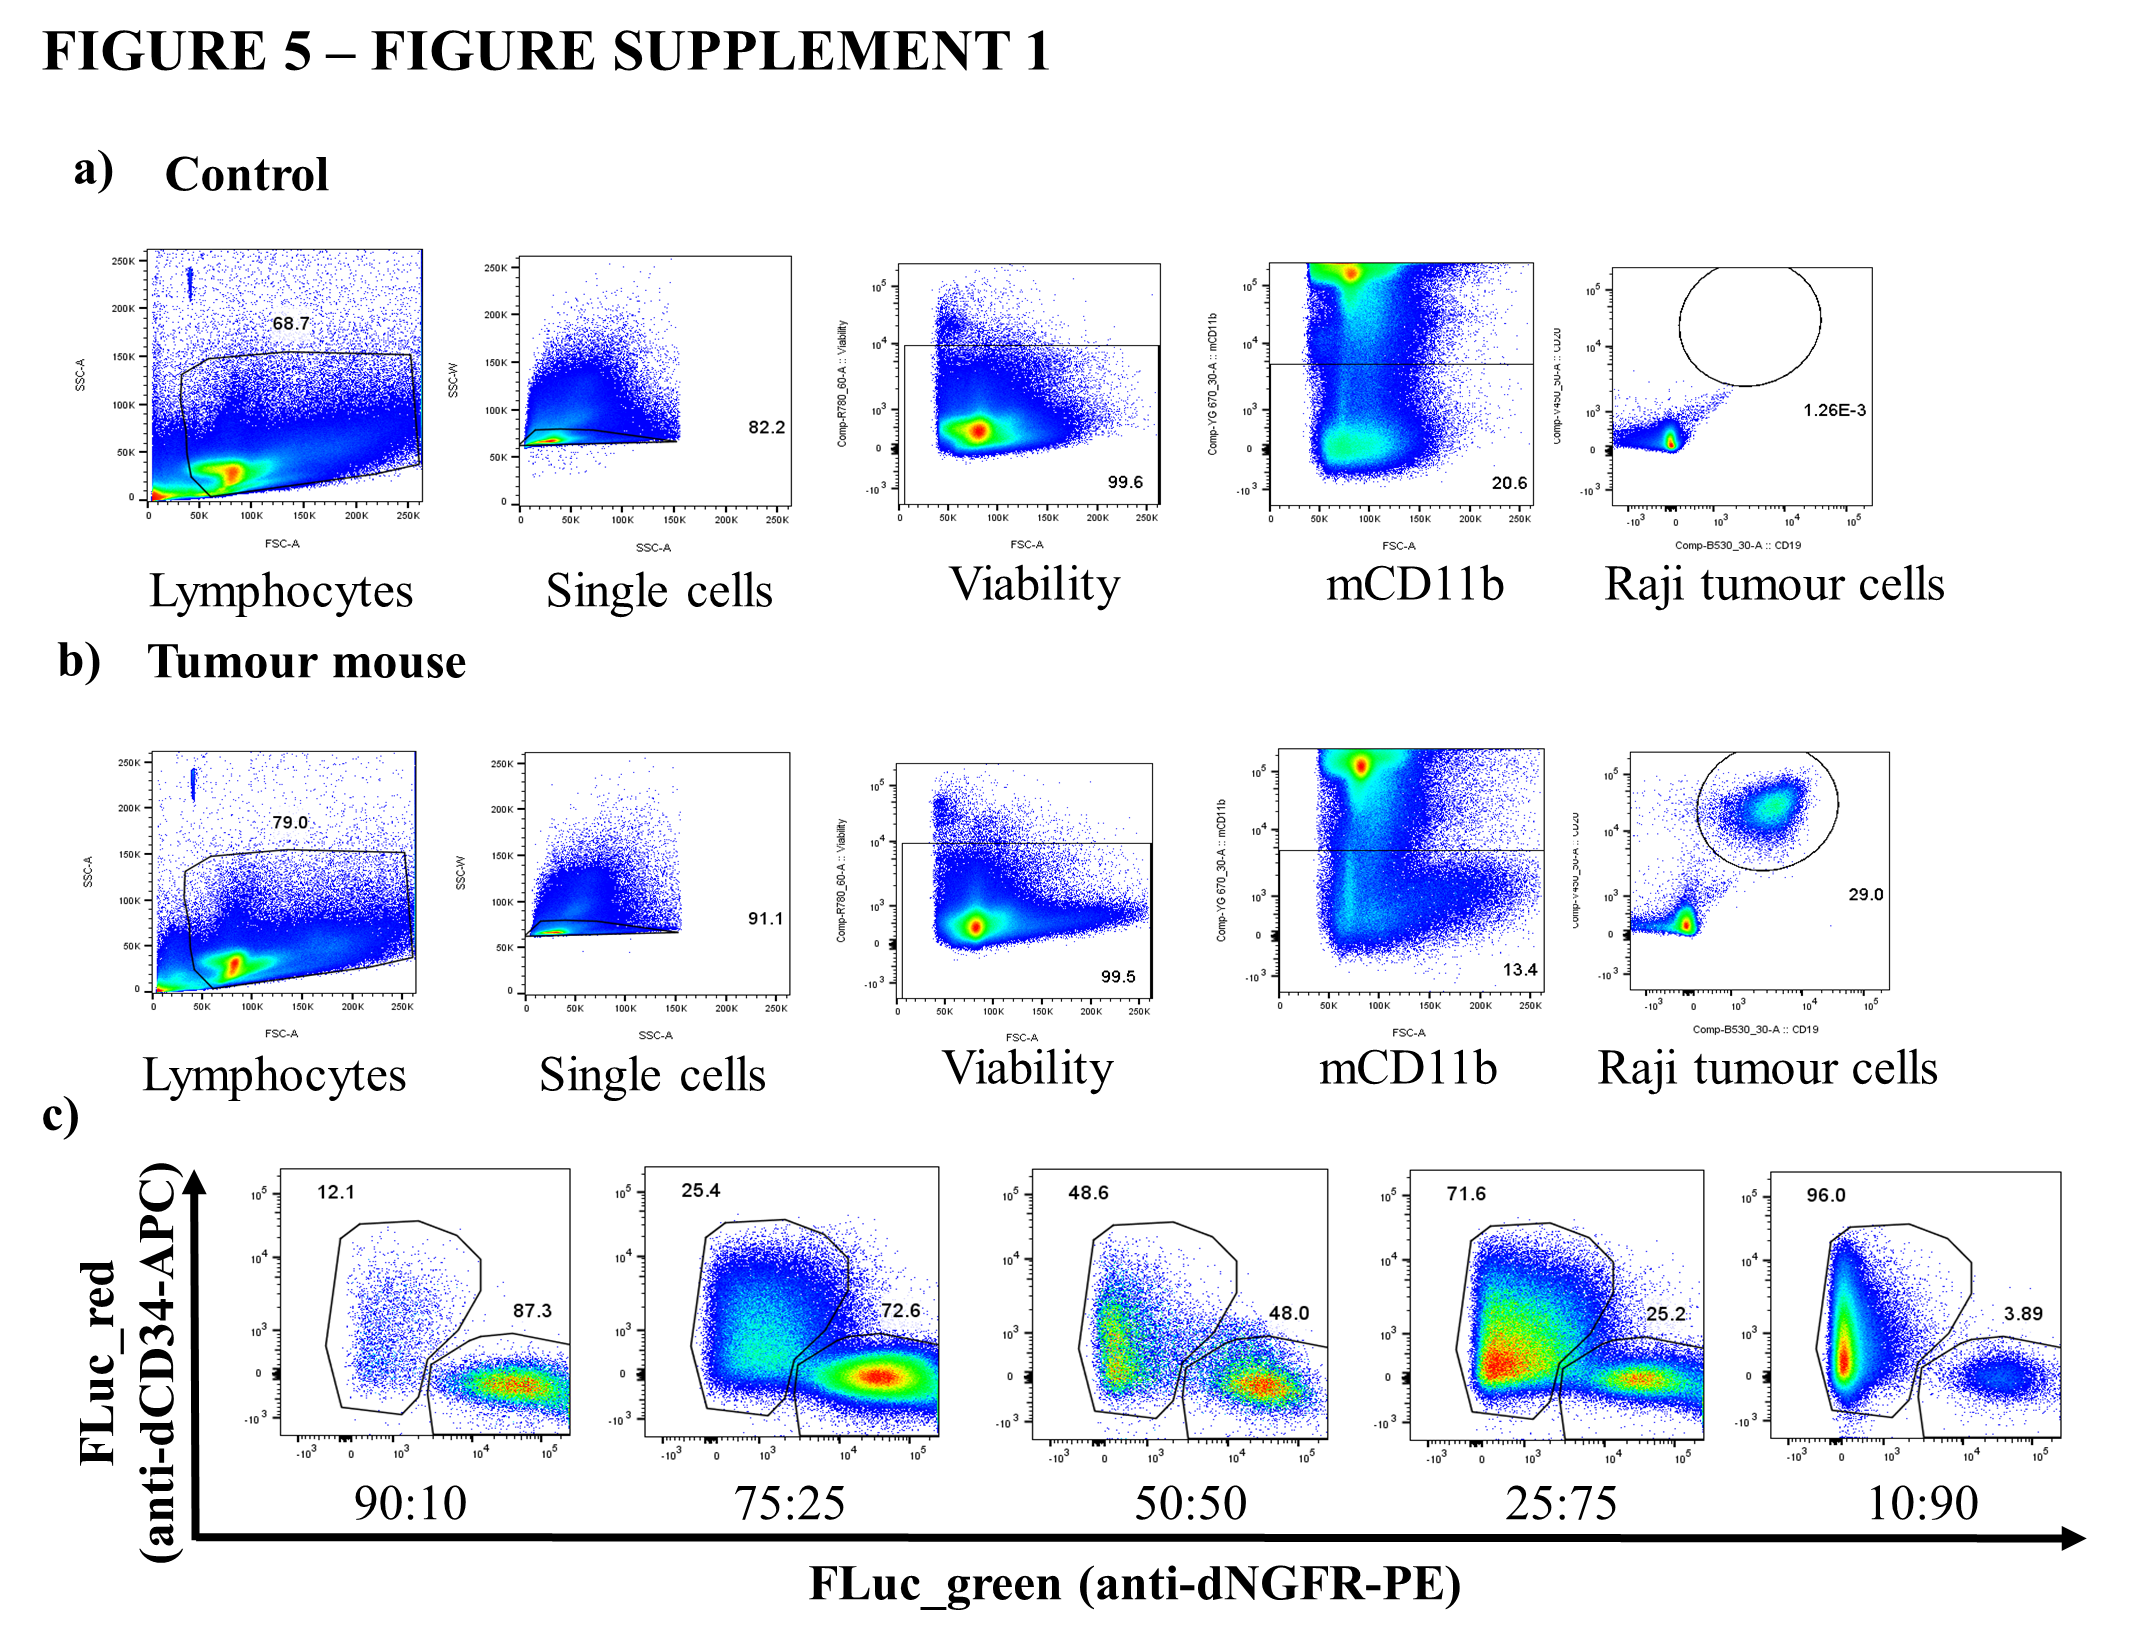

Supplement: supp [file elife-45801-supp-v1.zip › elife_poa_e45801_Figure_5_figure_supplement_1.tif]
